# Supplementary material
Source: publisher site journal article supplement (https://www.dovepress.com/get_supplementary_file.php?f=447855.xlsx)
Supplement: Supplementary file 1 [file get_supplementary_file.php]

## Sheet: Sheet1
Supplementary Table 1: RAW DATA FOR THE GESTATIONAL DIABETES MELLITUS (GDM) STUDY
id	age	gweek	weight	sbp	dbp	bpcat	raised bp	height (cm)	height (m)	bmi	educ	workstat	gravidit	gravida	para	abort	prevhos	hospreason	gdhist	famdiab	fmemb	xweight	macros	preglos	hwpreglos	deform	exer	subsabus	abusubs	fpg (mmol/L)	2 hr ogtt (mmol/L)	uti	cand	gd
g001	23	24	71	120	80	stage 1 hbp	yes	164.7	1.647	26.1741	none	house wife	multiparous	3	2	0	yes	ulcer	don't know	no		don't know	no	no		no	no	no		3.96	4.78	yes	no	no
g002	20	26	60	101	64	normal bp	no	163	1.63	22.5827	primary	house wife	prime gravida	1	0	0	no		don't know	no		yes	no	no		no	yes	no		4.61	4.54	no	no	no
g003	26	27	50	99	62	normal bp	no	155	1.55	20.8117	primary	house wife	multiparous	5	4	0	no		don't know	yes	uncle	don't know	yes	no		no	yes	no		4.61	5.58	no	no	no
g004	16	24	56	122	72	elevated bp	yes	165.8	1.658	20.3713	primary	house wife	prime gravida	1	0	0	yes	malaria	no	yes	uncle	yes	no	no		no	no	yes	alcohol	3.94	5.1	no	no	no
g005	22	27	67	108	66	normal bp	no	162.9	1.629	25.2483	primary	house wife	multiparous	2	1	0	yes	malria in pregnacy	no	don't know		yes	no	no		no	yes	no		4.75	5.35	yes	no	no
g006	34	24	83	146	87	stage 2 hbp	yes	162.5	1.625	31.432	secondary	employed	multiparous	4	3	0	no		no	yes	father	no	no	no		no	yes	no		4.37	5.66	no	no	no
g007	24	25	53	100	56	normal bp	no	159.4	1.594	20.8593	secondary	house wife	multiparous	3	2	0	no		no	no		no	no	no		no	yes	no		3.73	6.9	no	no	no
g008	23	24	60	107	73	normal bp	no	162.6	1.626	22.694	secondary	employed	multiparous	6	5	0	no		no	no		yes	no	no		yes	yes	no		3.82	5.54	yes	no	no
g009	27	25	62	128	76	elevated bp	yes	163.5	1.635	23.193	secondary	house wife	multiparous	4	3	0	no		no	no		yes	yes	no		no	yes	no		4.26	4.1	no	no	no
g011	18	26	59	107	71	normal bp	no	166.7	1.667	21.2315	primary	house wife	multiparous	2	1	0	yes	typhoid/ malaria	no	yes	uncle	yes	no	no		no	no	no		3.95	4.94	yes	no	no
g012	21	28	71	112	64	normal bp	no	177.7	1.777	22.4845	secondary	house wife	multiparous	2	1	0	no		no	no		no	no	no		no	yes	no		4.16	4.67	no	no	no
g013	27	24	59	124	70	elevated bp	yes	165.5	1.655	21.5405	secondary	employed	multiparous	5	2	2	yes	abortion	no	don't know		yes	no	yes	still birth and spontaneous abortion	no	yes	no		4.32	4.76	no	no	no
g014	19	24	59	118	69	normal bp	no	166.8	1.668	21.2061	primary	house wife	prime gravida	1	0	0	no		no	don't know		yes	no	no		no	yes	no		3.92	4.69	no	no	no
g015	21	27	52	115	69	normal bp	no	164.2	1.642	19.2867	primary	employed	prime gravida	1	0	0	no		no	yes	biological parents	don't know	no	no		no	yes	no		3.94	5.05	no	no	no
g016	33	24	78	117	69	normal bp	no	165.4	1.654	28.5117	primary	house wife	multiparous	4	3	0	no		don't know	yes	biological parents and uncles	no	yes	no		no	yes	no		4.36	6.1	no	no	no
g017	22	28	51	114	67	normal bp	no	162.5	1.625	19.3136	secondary	employed	prime gravida	1	0	0	no		no	no		yes	no	no		no	yes	no		3.96	3.61	yes	yes	no
g018	25	26	58	98	56	normal bp	no	157.7	1.577	23.3219	secondary	employed	multiparous	3	2	0	no		don't know	don't know		yes	no	no		no	yes	no		4.02	4.39	no	no	no
g019	24	24	69	125	84	stage 1 hbp	yes	168.3	1.683	24.3602	primary	employed	prime gravida	1	0	0	no		don't know	no		yes	no	no		no	yes	yes	alcohol	4.2	3.86	no	no	no
g020	25	25	56	103	61	normal bp	no	165	1.65	20.5693	primary	house wife	multiparous	5	3	1	no		no	don't know		yes	no	yes	spontaneous abortion before 20 weeks	yes	yes	no		4.71	5.87	no	no	no
g021	29	27	74	118	72	normal bp	no	162.6	1.626	27.9892	primary	employed	multiparous	4	3	0	no		don't know	yes	biological parents	don't know	no	no		no	yes	no		4.58	8	yes	no	no
g022	24	28	52	118	73	normal bp	no	162.6	1.626	19.6681	primary	employed	prime gravida	1	0	0	no		no	don't know		no	no	no		no	yes	no		4.25	4.04	yes	no	no
g023	27	24	47	110	68	normal bp	no	156	1.56	19.313	tertiary	employed	multiparous	2	1	0	yes	malaria	no	yes	aunt	no	no	no		no	yes	no		3.55	4.62	no	no	no
g024	28	27	77	110	68	normal bp	no	162.8	1.628	29.0524	primary	house wife	multiparous	6	2	3	no		don't know	yes	biological parents	yes	yes	yes	spontaneoues abortion before 20 weeks	no	yes	yes	alcohol	5.2	8.7	yes	no	yes
g025	19	24	65	138	78	stage 1 hbp	yes	162.6	1.626	24.5851	primary	house wife	prime gravida	1	0	0	no		no	don't know		yes	no	no		no	yes	no				yes	no
g026	30	26	68	95	68	normal bp	no	168.2	1.682	24.0357	primary	house wife	multiparous	3	2	0	no		no	yes	uncle	yes	no	no		no	yes	no				no	no
g027	32	24	59	100	60	normal bp	no	162.3	1.623	22.3983	secondary	employed	multiparous	4	3	0	no		don't know	yes	uncle	no	yes	no		no	no	no		4.3	5.28	no	no	no
g028	21	24	66	113	67	normal bp	no	157.67	1.5767	26.5489	secondary	house wife	multiparous	2	1	0	no		don't know	no		don't know	no	no		no	yes	no				no	no
g029	19	25	53	112	64	normal bp	no	130.3	1.303	31.2167	secondary	house wife	prime gravida	1	0	0	no		no	don't know		no	no	no		no	yes	no		3.81	6.4	no	no	no
g030	17	24	88	124	76	elevated bp	yes	156.7	1.567	35.8381	primary	house wife	prime gravida	1	0	0	no		no	don't know		yes	no	no		no	yes	no		4.41	4.58	no	no	no
g031	18	28	81	127	82	stage 1 hbp	yes	161.5	1.615	31.0556	secondary	house wife	prime gravida	1	0	0	yes	malaria	no	don't know		no	no	no		no	yes	no				no	no
g032	27	28	59	125	74	elevated bp	yes	165	1.65	21.6713	none	house wife	multiparous	4	2	0	no		no	no		don't know	no	no		no	yes	no		4.49	5.75	no	no	no
g033	20	28	70	110	70	normal bp	no	167	1.67	25.0995	primary	employed	multiparous	2	1	0	yes	malaria	no	no		yes	no	no		no	yes	no		4.35	4.88	yes	no	no
g034	27	24	62	136	104	stage 2 hbp	yes	157	1.57	25.1532	primary	house wife	multiparous	3	2	1	no		don't know	no		yes	yes	yes	spontaneous abortion before 20 weeks	no	yes	yes	alcohol	4.25	4.1	yes	no	no
g035	27	24	84	122	69	elevated bp	yes	163	1.63	31.6158	secondary	house wife	multiparous	2	1	0	yes	malaria/typhoid	no	yes	uncle	yes	no	no		no	no	no		5.31	6.51	no	no	yes
g036	23	27	70	109	70	normal bp	no	162	1.62	26.6728	primary	house wife	multiparous	3	2	0	no		don't know	don't know		yes	yes	no		no	yes	no		4.57	5.85	yes	no	no
g038	20	25	73	107	70	normal bp	no	153.5	1.535	30.9818	secondary	house wife	multiparous	2	1	0	no		no	no		don't know	no	no		no	no	no		4.5	5.42	no	no	no
g039	24	28	70	125	74	elevated bp	yes	164.2	1.642	25.9628	secondary	house wife	prime gravida	1	0	0	no		no	no		no	no	no		no	yes	no		4.8	5.13	yes	no	no
g040	27	25	51	119	70	normal bp	no	160.4	1.604	19.8226	tertiary	employed	multiparous	3	1	1	yes	malaria/typhoid	don't know	yes	uncle	no	no	yes	still birth after 20 weeks	no	yes	no		4.14	4.91	no	no	no
g041	20	24	59	127	73	elevated bp	yes	155	1.55	24.5578	primary	house wife	prime gravida	1	0	0	no		no	don't know		yes	no	no		no	yes	no		4.47	5.94	no	no	no
g042	27	27	48	102	67	normal bp	no	156.2	1.562	19.6734	primary	house wife	multiparous	7	5	1	no		don't know	don't know		no	yes	yes	still birth after 20 weeks	no	yes	no		4.81	6.98	yes	no	no
g043	19	24	60	107	57	normal bp	no	166.4	1.664	21.6693	secondary	house wife	prime gravida	1	0	0	yes	complicated malaria	no	yes	biological parent	yes	no	no		no	no	no		4.32	4.28	no	no	no
g044	26	25	66	105	55	normal bp	no	162.4	1.624	25.0249	primary	house wife	multiparous	2	1	0	no		don't know	no		no	no	no		no	yes	no		4.01	4.23	no	no	no
g045	35	24	53	101	63	normal bp	no	164	1.64	19.7055	primary	house wife	multiparous	8	7	0	no		don't know	don't know		no	no	no		no	yes	no		4.35	4.71	no	no	no
g046	30	28	72	91	59	normal bp	no	160.3	1.603	28.0198	primary	house wife	multiparous	6	3	2	no		don't know	yes	grand parent	yes	no	yes	miscaraige before 20 weeks	yes	no	no		4.29	5.11	no	no	no
g047	25	24	50	156	105	stage 2 hbp	yes	158	1.58	20.0288	secondary	house wife	multiparous	2	1	0	no		don't know	yes	grand parent	no	no	no		no	no	no		4.06	5.4	yes	no	no
g048	17	25	56	115	68	normal bp	no	163.3	1.633	20.9998	primary	house wife	prime gravida	1	0	0	yes	complicated malaria	don't know	yes	bioloical paents	no	no	no		no	no	no		3.8	3.67	no	no	no
g049	24	24	50	115	70	normal bp	no	170.4	1.704	17.2199	primary	house wife	multiparous	3	2	0	no		no	no		no	no	no		no	no	no		3.6	4.12	no	no	no
g050	27	25	59	101	64	normal bp	no	169.2	1.692	20.6087	primary	house wife	multiparous	3	2	0	no		don't know	no		yes	yes	no		no	yes	no				no	no
g051	20	25	55	103	63	normal bp	no	155	1.55	22.8928	primary	employed	prime gravida	1	0	0	no		no	no		no	no	no		no	yes	no		4.12	4.38	yes	no	no
g052	34	28	101	127	76	elevated bp	yes	167.3	1.673	36.0852	tertiary	employed	multiparous	6	5	0	yes	accident	don't know	no		yes	yes	no		no	yes	no		4.33	6.32	no	no	no
g053	21	28	55	108	67	normal bp	no	162.6	1.626	20.8028	primary	employed	multiparous	2	0	1	yes	abortion and accident	no	no		no	yes	no		no	yes	no		4.2	5.58	no	no	no
g054	27	27	55	98	55	normal bp	no	158	1.58	22.0317	primary	employed	multiparous	3	1	1	no		no	yes	grand parent	no	no	yes	miscaraige before 20 weeks	no	yes	no				no	no
g055	20	24	66	97	59	normal bp	no	160.6	1.606	25.589	primary	house wife	multiparous	3	1	1	yes	malaria/ typhoid	no	yes	grand parent	no	no	yes	miscaraige before 20 weeks	no	yes	no		3.88	2.74	no	no	no
g056	25	26	60	103	63	normal bp	no	158.2	1.582	23.9739	primary	house wife	multiparous	3	2	0	no		don't know	no		yes	no	no		no	no	yes	alcohol	4.42	6.61	no	no	no
g057	21	24	52	123	70	elevated bp	yes	152	1.52	22.5069	primary	house wife	prime gravida	1	0	0	yes	malaria in pregnancy	no	yes	grand parent	don't know	no	no		no	yes	no				no	no
g058	28	28	67	126	78	elevated bp	yes	157.9	1.579	26.8727	none	house wife	multiparous	3	2	0	no		don't know	yes	grand parent	yes	yes	no		no	yes	no		4.31	4.7	yes	yes	no
g059	25	27	63	112	72	normal bp	no	152	1.52	27.268	secondary	house wife	multiparous	3	1	0	no		don't know	no		no	no	no		no	yes	no				no	no
g060	26	24	61	103	73	normal bp	no	162	1.62	23.2434	primary	house wife	multiparous	2	1	0	yes	uti in pregnancy	no	no		yes	yes	no		no	yes	no		4.57	6.14	no	no	no
g061	16	24	62	112	70	normal bp	no	150	1.5	27.5556	primary	house wife	prime gravida	1	0	0	no		no	no		don't know	no	no		no	no	no				no	no
g062	24	24	63	103	63	normal bp	no	151	1.51	27.6304	primary	house wife	multiparous	4	3	1	no		no	yes	grand parent	don't know	no	yes	still birth after 20 weeks	no	yes	no		4.76	4.62	no	no	no
g063	27	28	64	125	82	stage 1 hbp	yes	159.5	1.595	25.157	primary	house wife	multiparous	4	2	0	no		don't know	don't know		yes	no	no		no	yes	yes	alcohol	4.15	6.43	no	no	no
g064	28	28	57	115	72	normal bp	no	161.2	1.612	21.9354	tertiary	employed	multiparous	3	2	0	no		don't know	don't know		no	no	no		no	yes	no		3.79	4.96	yes	yes	no
g065	17	28	48	115	64	normal bp	no	150	1.5	21.3333	primary	house wife	prime gravida	1	0	0	yes	malaria	no	yes	uncle	no	no	no		no	yes	no		3.93	5.16	no	no	no
g066	21	26	54	100	59	normal bp	no	156	1.56	22.1893	primary	house wife	multiparous	2	1	0	no		no	no		don't know	no	no		no	yes	no		4.23	5.41	no	no	no
g067	28	28	53.3	96	58	normal bp	no	151	1.51	23.3762	primary	employed	multiparous	4	2	1	no		no	no		don't know	no	yes	still birth after 20 weeks	no	no	yes	alcohol	3.98	5.45	no	no	no
g068	21	24	63	106	62	normal bp	no	157.2	1.572	25.4939	primary	house wife	multiparous	2	1	0	no		don't know	don't know		yes	no	no		no	yes	no				no	no
g069	30	28	124	135	78	stage 1 hbp	yes	178	1.78	39.1365	primary	house wife	multiparous	4	3	0	yes	ceaser	no	don't know		yes	yes	no		no	no	no		4.41	7.11	yes	no	no
g070	24	24	69	99	63	normal bp	no	189.5	1.895	19.2146	secondary	employed	multiparous	2	1	0	yes	typhoid/ malaria	don't know	don't know		yes	no	no		no	no	yes	alcohol	4.52	5.27	yes	no	no
g071	24	25	59	112	69	normal bp	no	188.5	1.885	16.6046	secondary	employed	multiparous	2	1	0	no		don't know	don't know		yes	no	no		no	yes	no		4.08	4.75	no	no	no
g072	22	25	57	103	69	normal bp	no	159.4	1.594	22.4336	secondary	house wife	multiparous	2	1	0	no		don't know	don't know		yes	no	no		no	yes	no		4.18	6.21	no	no	no
g073	20	27	71.5	90	69	normal bp	no	169.6	1.696	24.8573	secondary	employed	prime gravida	1	0	0	yes	malaria	no	don't know		yes	no	no		no	yes	no		4.49	5.36	no	no	no
g074	36	28	70	100	67	normal bp	no	163.2	1.632	26.282	primary	house wife	multiparous	6	4	0	no		don't know	yes	sister	yes	yes	no		no	yes	no				no	no
g076	20	24	63	110	60	normal bp	no	154	1.54	26.5643	primary	house wife	prime gravida	1	0	0	yes	syphilis	no	yes	grand parent	yes	no	no		no	yes	no		3.85	6.24	yes	no	no
g077	26	24	79	109	54	normal bp	no	188	1.88	22.3517	secondary	house wife	multiparous	3	2	0	no		don't know	no		yes	yes	no		no	yes	no				no	no
g079	28	24	79	122	89	stage 1 hbp	yes	153.3	1.533	33.6157	primary	house wife	multiparous	3	2	0	yes	malaria	don't know	no		yes	yes	no		yes	yes	no		4.84	5.93	no	no	no
g080	25	24	67.5	106	62	normal bp	no	150.8	1.508	29.6825	primary	house wife	multiparous	5	4	0	no		don't know	don't know		yes	yes	no		yes	yes	no		4.54	5.79	yes	yes	no
g081	21	24	60	122	74	elevated bp	yes	153.7	1.537	25.3982	primary	house wife	prime gravida	1	0	0	no		no	don't know		yes	no	no		no	yes	no		3.95	5.09	no	no	no
g082	18	26	60	107	61	normal bp	no	157	1.57	24.3418	primary	house wife	prime gravida	1	0	0	no		no	don't know		yes	no	no		no	no	no		4.8	5.15	no	no	no
g083	23	24	53	116	67	normal bp	no	154.8	1.548	22.1174	secondary	house wife	prime gravida	1	0	0	no		no	no		no	no	no		no	no	no		3.02	4.08	no	no	no
g084	22	24	55	106	60	normal bp	no	155.3	1.553	22.8045	secondary	employed	multiparous	2	1	0	yes	sickle cell, bilateral paralysis and malaria	don't know	yes	aunt	yes	yes	no		no	no	no		4.21	6.2	yes	no	no
g085	19	28	56	116	68	normal bp	no	152.5	1.525	24.0795	primary	house wife	multiparous	2	1	0	no		don't know	no		yes	no	no		no	yes	no		4.2	5.14	no	no	no
g086	16	27	61	100	94	stage 2 hbp	yes	154	1.54	25.721	primary	house wife	prime gravida	1	0	0	no		don't know	no		no	no	no		no	no	no		4.06	4.74	no	no	no
g087	35	24	70	130	64	stage 1 hbp	yes	156.7	1.567	28.5076	primary	house wife	multiparous	5	4	0	no		don't know	yes	sister	no	yes	no		no	yes	no		4.16	2.92	no	no	no
g088	22	24	84	107	61	normal bp	no	162.3	1.623	31.8891	primary	house wife	multiparous	4	3	0	yes	malaria	no	no		no	yes	no		no	yes	no		5.14	6.71	no	no	yes
g089	18	24	56	104	68	normal bp	no	152.6	1.526	24.048	primary	house wife	prime gravida	1	0	0	no		no	don't know		yes	no	no		no	yes	no		5.79	9.64	yes	no	yes
g090	23	24	61	125	74	elevated bp	yes	156.2	1.562	25.0016	primary	house wife	multiparous	3	1	0	no		don't know	don't know		yes	yes	no		no	yes	no		4.41	5.59	no	no	no
g091	26	25	62.5	111	62	normal bp	no	161.2	1.612	24.0519	secondary	house wife	prime gravida	1	0	0	yes	ovarian cyst	don't know	don't know		yes	no	no		no	yes	no		4.66	3.33	no	no	no
g092	28	28	63	105	70	normal bp	no	163.3	1.633	23.6248	primary	house wife	multiparous	4	3	0	yes	malaria	don't know	no		no	no	no		no	no	yes	alcohol	4.6	7.67	yes	no	no
g093	27	26	75	105	65	normal bp	no	160.3	1.603	29.1873	primary	house wife	multiparous	4	3	0	no		don't know	yes	grand parent	no	no	no		no	yes	no		4.31	4.83	no	no	no
g094	32	28	57	116	73	normal bp	no	157	1.57	23.1247	tertiary	employed	prime gravida	1	0	0	no		no	no		yes	no	no		no	yes	no				no	no
g095	29	28	64	134	90	stage 2 hbp	yes	156.7	1.567	26.0641	primary	house wife	multiparous	3	2	0	yes	ceaser	don't know	yes	grand parent	yes	no	no		no	no	no				no	no
g096	23	26	70.5	126	78	elevated bp	yes	163.2	1.632	26.4697	secondary	house wife	prime gravida	1	0	0	yes	typhoid/ malaria	no	yes	uncle	no	no	no		no	no	no		5.14	5.09	no	no	yes
g097	39	27	75	98	58	normal bp	no	160.7	1.607	29.0422	none	house wife	multiparous	7	6	0	no		don't know	don't know		don't know	yes	no		no	yes	no				no	no
g098	22	28	61	111	65	normal bp	no	160.1	1.601	23.7984	primary	house wife	multiparous	2	1	0	no		don't know	don't know		yes	no	no		no	yes	no		3.95	6.25	yes	no	no
g099	26	24	69	115	70	normal bp	no	163.7	1.637	25.7485	primary	employed	multiparous	2	1	0	no		don't know	don't know		don't know	no	no		no	no	no		4.55	4.22	yes	no	no
g100	20	27	60	120	80	stage 1 hbp	yes	152.6	1.526	25.7657	primary	house wife	prime gravida	1	0	0	no		don't know	don't know		yes	no	no		no	yes	no		4.02	4.17	no	no	no
g101	19	28	64	116	67	normal bp	no	156.7	1.567	26.0641	primary	house wife	prime gravida	1	0	0	yes	malaria	no	don't know		don't know	no	no		no	no	no		4.59	5.86	no	no	no
g102	21	28	61	111	61	normal bp	no	160.7	1.607	23.621	primary	house wife	prime gravida	1	0	0	yes	severe aneamia	no	don't know		yes	no	no		no	no	no		4.15	5.8	no	no	no
g103	29	28	64	95	62	normal bp	no	153.7	1.537	27.0914	secondary	house wife	multiparous	4	3	0	yes	malaria	don't know	yes	mother	don't know	yes	no		no	yes	no		4.4	5.92	no	no	no
g104	25	28	71.5	107	62	normal bp	no	165.5	1.655	26.1042	primary	house wife	multiparous	3	2	0	yes	malaria	don't know	no		no	no	no		no	no	no		4.18	5.67	no	no	no
g105	30	24	92	112	59	normal bp	no	159.6	1.596	36.1179	primary	house wife	multiparous	6	3	2	no		don't know	yes	mother	yes	yes	yes	still birth after 20 weeks	no	no	no				yes	no
g106	27	24	75	95	63	normal bp	no	155.3	1.553	31.097	secondary	house wife	multiparous	4	3	0	no		don't know	yes	grand mother	yes	yes	no		no	yes	no		4.25	4	no	no	no
g107	20	26	46	98	73	normal bp	no	148.8	1.488	20.7755	secondary	house wife	prime gravida	1	0	0	yes	malaria	no	don't know		don't know	no	no		no	yes	no		4.81	4.9	no	no	no
g108	17	24	57	115	72	normal bp	no	153.7	1.537	24.1283	secondary	house wife	prime gravida	1	0	0	no		no	don't know		no	no	no		no	yes	no		4.12	4.57	no	no	no
g109	25	28	56	118	72	normal bp	no	157.7	1.577	22.5177	primary	house wife	multiparous	2	1	0	no		don't know	don't know		yes	yes	no		no	yes	no				no	no
g110	28	28	64	105	72	normal bp	no	161	1.61	24.6904	primary	employed	multiparous	3	2	0	no		don't know	don't know		yes	no	no		no	no	no		5.42	5.54	no	yes	yes
g111	18	24	56	106	69	normal bp	no	156	1.56	23.0112	primary	house wife	prime gravida	1	0	0	yes	malaria	no	no		don't know	no	no		no	yes	no		4.02	4.64	yes	no	no
g112	36	28	80	122	82	stage 1 hbp	yes	162.3	1.623	30.3706	tertiary	employed	multiparous	3	1	1	yes	backpain	don't know	yes	mother	no	no	yes	miscaraige before 20 weeks	no	yes	yes	alcohol			yes	no
g113	24	28	74	119	71	normal bp	no	163	1.63	27.852	primary	house wife	multiparous	3	2	0	no		don't know	no		yes	no	no		no	yes	no		4.12	5.33	yes	no	no
g114	26	28	66	121	75	elevated bp	yes	156	1.56	27.1203	tertiary	house wife	prime gravida	1	0	0	yes	malaria	no	don't know		no	no	no		no	no	no		4.29	4.9	yes	yes	no
r001	28	28	102	115	73	normal bp	no	170.3	1.703	35.1699	primary	house wife	multiparous	4	3	0	no		yes	no		yes	yes	no		no	no	no				no	no
r002	24	25	74	108	67	normal bp	no	166.8	1.668	26.5974	none	house wife	multiparous	4	3	1	yes	abortion	don't know	don't know		yes	no	yes	miscarriage before 20 weeks	no	yes	no				no	no
r003	18	24	48	96	55	normal bp	no	155	1.55	19.9792	primary	house wife	prime gravida	1	0	0	no		don't know	don't know		yes	no	no		no	yes	no		4.54	5.59	no	no	no
r004	26	28	60	112	73	normal bp	no	170.1	1.701	20.7368	secondary	employed	prime gravida	1	0	0	no		no	yes	father	yes	no	no		no	yes	no		5.28	6.63	yes	no	yes
r005	22	25	55	105	52	normal bp	no	160	1.6	21.4844	primary	house wife	multiparous	2	1	0	yes	malaria	no	no		no	no	no		no	yes	no				no	no
r006	21	25	57.5	106	61	normal bp	no	167.4	1.674	20.519	primary	employed	prime gravida	1	0	0	no		no	yes	mother	no	no	no		no	no	no				no	no
r007	32	24	70.5	121	69	elevated bp	yes	164	1.64	26.2121	primary	employed	multiparous	4	3	0	no		no	no		no	no	no		no	no	no		4.52	6.64	no	no	no
r008	24	28	55	103	57	normal bp	no	162.5	1.625	20.8284	primary	employed	multiparous	2	1	0	no		no	no		yes	no	no		no	yes	no		3.86	5.16	no	yes	no
r009	34	28	79	122	68	elevated bp	yes	166.5	1.665	28.497	primary	house wife	multiparous	3	1	1	no		no	yes	mother	no	no	yes	stillbirth after 20 weeks	no	yes	no		4.31	4.91	no	no	no
r010	22	28	60	118	79	normal bp	no	163.6	1.636	22.4174	secondary	house wife	multiparous	4	1	2	yes	abortion	no	yes	uncle	no	no	yes	miscarriage before 20 weeks	no	yes	no				no	no
r011	20	26	68	129	78	elevated bp	yes	176	1.76	21.9525	tertiary	house wife	prime gravida	1	0	0	no		no	yes	uncle	no	no	no		no	no	no		4.28	5.11	no	no	no
r012	35	28	67.4	103	64	normal bp	no	168.2	1.682	23.8236	secondary	house wife	multiparous	4	3	0	yes	malaria	no	yes	mother	no	no	no		no	yes	no		3.36	6.66	no	no	no
r013	24	28	69	116	69	normal bp	no	171.6	1.716	23.4323	secondary	employed	prime gravida	1	0	0	no		no	no		no	no	no		no	yes	no		4.19	4.41	yes	no	no
r014	32	28	70	93	55	normal bp	no	172	1.72	23.6614	tertiary	employed	multiparous	3	2	0	no		no	yes	mother	no	no	no		no	yes	no		4.49	5.38	no	no	no
r015	27	28	83	138	69	stage 1 hbp	yes	155	1.55	34.5473	primary	employed	multiparous	4	1	2	yes	malaria	no	don't know		no	no	no		no	yes	no		4.48	6.76	yes	no	no
r016	27	27	72	120	73	elevated bp	yes	167.5	1.675	25.6627	secondary	employed	multiparous	4	2	1	no		no	no		no	no	no		no	yes	no		4.36	3.37	yes	no	no
r017	25	25	52	127	66	elevated bp	yes	168.4	1.684	18.3366	primary	house wife	multiparous	3	2	0	no		no	no		no	no	no		no	yes	no				no	no
r018	24	27	64	106	45	normal bp	no	158	1.58	25.6369	primary	employed	multiparous	2	0	1	no		no	no		no	no	yes	stillbirth after 20 weeks	no	no	no		4.09	4.98	no	no	no
r019	24	28	51	99	55	normal bp	no	156.8	1.568	20.7433	secondary	house wife	multiparous	6	5	0	no		no	don't know		no	no	no		no	yes	no		4.13	4.22	yes	no	no
r020	24	27	64.5	117	64	normal bp	no	167.5	1.675	22.9895	secondary	house wife	multiparous	2	1	0	no		no	no		no	no	no		no	yes	no		4.04	5.49	no	no	no
r021	32	28	82.1	120	89	stage 1 hbp	yes	166.4	1.664	29.6508	tertiary	employed	multiparous	3	2	0	yes	hernia	no	yes	uncle	no	no	no		no	no	no		4.56	3.24	no	no	no
r022	21	24	51.5	108	51	normal bp	no	158.8	1.588	20.4224	primary	employed	prime gravida	1	0	0	no		no	no		no	no	no		no	no	no		3.94	3.99	no	no	no
r024	19	27	54	102	49	normal bp	no	158	1.58	21.6311	primary	house wife	prime gravida	1	0	0	no		no	no		no	no	no		no	no	no				no	no
r025	34	27	63.5	113	67	normal bp	no	166.2	1.662	22.9886	primary	employed	multiparous	4	3	0	no		no	no		no	no	no		no	no	no		4.68	4.54	no	no	no
r026	33	24	77	105	58	normal bp	no	162.6	1.626	29.1239	secondary	employed	multiparous	4	3	0	no		no	no		no	no	no		no	no	no				yes	yes
r027	23	24	58.5	121	67	elevated bp	yes	160.1	1.601	22.823	primary	employed	prime gravida	1	0	0	no		no	no		no	no	no		no	no	no		4.61	5.2	yes	no	no
r028	18	27	64	134	79	stage 1 hbp	yes	167.6	1.676	22.7841	primary	house wife	prime gravida	1	0	0	no		no	no		no	no	no		no	no	no		3.74	4.8	no	no	no
r029	20	28	60.5	135	85	stage 1 hbp	yes	169	1.69	21.1827	secondary	house wife	prime gravida	1	0	0	no		no	no		no	no	no		no	no	no		3.86	3.43	no	no	no
r030	27	24	64	124	64	elevated bp	yes	167.3	1.673	22.8659	tertiary	employed	multiparous	2	0	1	no		no	yes	uncle	no	yes	yes	stillbirth after 20 weeks	yes	yes	no		4.84	6.62	yes	no	no
r031	27	24	77	117	69	normal bp	no	164.5	1.645	28.455	tertiary	employed	multiparous	2	1	0	yes	malaria	don't know	yes	father	yes	no	no		no	yes	no		3.87	4.41	no	no	no
r032	20	25	53	110	60	normal bp	no	152.4	1.524	22.8195	primary	house wife	prime gravida	1	0	0	no		no	no		no	no	no		no	no	no		4.59	6.06	yes	yes	no
r033	20	24	61	129	55	elevated bp	yes	162.4	1.624	23.129	secondary	employed	prime gravida	1	0	0	no		don't know	no		no	no	no		no	yes	no		4.1	5.39	yes	no	no
r034	20	26	55	110	72	normal bp	no	150	1.5	24.4444	primary	house wife	prime gravida	1	0	0	no		don't know	no		yes	no	no		no	yes	no		3.98	4.61	yes	yes	no
r035	28	25	82.5	121	58	elevated bp	yes	163.4	1.634	30.8994	secondary	house wife	multiparous	4	3	0	no		no	no		no	no	no		no	no	no		4.15	4.07	yes	yes	no
r036	23	27	66	117	71	normal bp	no	171.3	1.713	22.4921	primary	house wife	multiparous	2	1	0	no		don't know	don't know		yes	no	no		no	yes	no		3.53	4.48	yes	no	no
r037	18	28	56	113	65	normal bp	no	163	1.63	21.0772	secondary	house wife	prime gravida	1	0	0	no		no	don't know		no	no	no		no	no	no		4.17	3.69	no	no	no
r038	22	24	61	114	64	normal bp	no	159	1.59	24.1288	secondary	house wife	multiparous	2	0	1	yes	typhoid	don't know	yes	parent, sister	yes	no	yes	miscarriage before 20 weeks	no	yes	no		4.95	4.12	yes	yes	no
r039	33	25	56	111	55	normal bp	no	154	1.54	23.6128	primary	house wife	multiparous	5	4	0	no		don't know	yes	mother	yes	no	no		no	yes	no		4.26	3.56	no	no	no
r040	23	27	61	101	57	normal bp	no	167	1.67	21.8724	secondary	house wife	multiparous	2	1	0	yes	malaria	don't know	yes	uncle, parent	yes	yes	no		no	yes	no		4.27	5.09	yes	no	no
r041	19	28	63.1	114	59	normal bp	no	170.6	1.706	21.6806	primary	house wife	multiparous	2	1	0	no		no	no		no	no	no		no	no	no		3.99	4.66	no	no	no
r042	17	28	51.8	100	69	normal bp	no	153.7	1.537	21.9271	primary	house wife	prime gravida	1	0	0	no		no	no		no	no	no		no	no	no		4.55	2.67	yes	yes	no
r043	23	28	65	114	62	normal bp	no	152	1.52	28.1337	tertiary	employed	multiparous	2	1	0	no		no	no		no	no	no		no	no	no		4.25	5.18	yes	no	no
r044	16	24	55	128	84	stage 1 hbp	yes	151.3	1.513	24.0262	secondary	house wife	prime gravida	1	0	0	no		no	no		no	no	no		no	no	no		4.21	5.68	no	yes	no
r045	17	28	52	87	52	normal bp	no	160.3	1.603	20.2365	primary	house wife	multiparous	2	0	1	no		no	no		no	no	yes	miscarriage before 20 weeks	no	no	no		3.9	3.7	no	yes	no
r046	20	24	72	112	65	normal bp	no	171.4	1.714	24.5082	secondary	house wife	multiparous	2	1	0	no		no	no		no	no	no		no	no	no		4.08	6.03	yes	yes	no
r047	30	24	83	140	79	stage 2 hbp	yes	172	1.72	28.0557	secondary	house wife	multiparous	3	2	0	no		no	no		no	no	no		no	no	no		4.93	6.21	yes	no	no
r048	30	26	88.6	128	83	stage 1 hbp	yes	171.1	1.711	30.2645	secondary	employed	multiparous	3	2	0	yes	ceaserian	no	yes	parent	no	yes	yes	miscarriage before 20 weeks	no	no	no		4.36	6.3	no	no	no
r049	35	24	58	104	68	normal bp	no	158.4	1.584	23.1163	tertiary	employed	multiparous	4	3	0	yes	malaria	no	yes	parent, brother	no	no	no		no	no	no		4.06	4.53	no	no	no
r050	18	28	59	121	77	elevated bp	yes	164.5	1.645	21.8032	secondary	house wife	prime gravida	1	0	0	no		no	no		no	no	no		no	no	no		4.04	4.9	yes	yes	no
r051	34	28	71	98	60	normal bp	no	160.4	1.604	27.5962	primary	employed	multiparous	4	3	0	no		no	no		no	no	no		no	no	no		5.09	6.9	no	yes	no
r052	25	27	61	121	77	elevated bp	yes	152	1.52	26.4024	secondary	employed	prime gravida	1	0	0	no		no	no		no	no	no		no	no	no		5.17	6.47	yes	yes	yes
r053	20	28	57	100	58	normal bp	no	159.2	1.592	22.49	secondary	house wife	multiparous	2	1	0	no		no	no		no	no	no		no	no	no		4.27	4.09	no	no	no
r054	24	25	65	119	70	normal bp	no	155	1.55	27.0552	secondary	employed	prime gravida	1	0	0	no		no	no		no	no	no		no	no	no		4.43	4.26	no	no	no
r055	30	28	54.5	127	68	elevated bp	yes	160.2	1.602	21.2359	primary	employed	multiparous	5	3	1	no		no	no		no	no	yes	miscarriage before 20 weeks	no	no	no				no	no
r056	30	28	74	109	69	normal bp	no	161	1.61	28.5483	primary	employed	multiparous	5	4	0	no		no	no		no	no	no		no	yes	no				no	no
r057	27	27	68.5	143	93	stage 2 hbp	yes	169.6	1.696	23.8144	tertiary	employed	prime gravida	1	0	0	no		no	no		no	no	no		no	no	no		4.83	5.59	yes	no	no
r058	18	28	68	121	54	elevated bp	yes	169.8	1.698	23.5849	primary	employed	prime gravida	1	0	0	no		no	no		no	no	no		no	no	no				no	no
r059	25	28	58	96	41	normal bp	no	158.5	1.585	23.0871	tertiary	employed	multiparous	3	2	0	no		no	yes	parent	no	no	no		no	no	no		4.38	5.66	no	no	no
r060	19	24	62.3	114	61	normal bp	no	170.4	1.704	21.456	secondary	employed	prime gravida	1	0	0	no		no	no		no	no	no		no	no	no		4.39	5.7	no	no	no
r061	15	26	63	121	77	elevated bp	yes	163.3	1.633	23.6248	primary	house wife	prime gravida	1	0	0	no		no	no		no	no	no		no	no	no		3.57	5.46			no
r062	25	24	59.5	125	75	elevated bp	yes	165	1.65	21.8549	secondary	employed	multiparous	3	0	2	no		no	don't know		no	no	yes	stillbirth after 20 weeks	no	no	no		4.22	5.31	no	no	no
r063	23	28	59	117	59	normal bp	no	161.5	1.615	22.6207	primary	house wife	multiparous	2	1	0	no		no	no		no	no	no		no	no	no				no	no
r064	28	28	69	110	62	normal bp	no	155.9	1.559	28.3894	primary	employed	multiparous	4	3	0	no		no	yes	parent	no	no	no		no	no	no		4.01	3.85			no
r065	24	28	54	149	94	stage 2 hbp	yes	170.3	1.703	18.6193	tertiary	employed	prime gravida	1	0	0	yes	malaria	no	no		no	no	no		no	no	no		3.9	3.48	yes	yes	no
r066	27	28	71.5	114	71	normal bp	no	164.2	1.642	26.5192	tertiary	employed	multiparous	2	1	0	yes	typhoid and malaria	no	no		no	yes	no		no	yes	no				yes	no
r067	22	28	73.5	111	75	normal bp	no	151	1.51	32.2354	secondary	employed	multiparous	2	1	0	yes	ceaser and malaria	no	yes	uncle	no	yes	no		yes	yes	no		4.89	6.73	yes	yes	no
r068	34	24	81	125	59	elevated bp	yes	171	1.71	27.7008	none	employed	multiparous	4	3	0	yes	typhoid and malaria	no	no		no	no	no		no	no	no		4.54	6.16	no	no	no
r069	39	24	62	111	65	normal bp	no	159.3	1.593	24.4321	primary	employed	multiparous	6	4	1	yes	typhoid and malaria	no	no		no	no	yes	miscarriage before 20 weeks	no	yes	no		5.25	5.11	yes	yes	yes
r070	28	28	60	120	62	elevated bp	yes	166	1.66	21.7738	primary	employed	multiparous	4	2	1	no		no	yes	uncle	no	no	yes	miscarriage before 20 weeks	no	no	no		3.46	6.76	no	no	no
r071	21	28	64	119	63	normal bp	no	160.8	1.608	24.7519	primary	house wife	multiparous	2	1	0	no		no	no		no	no	no		no	no	no				no	no
r072	25	24	57.9	106	58	normal bp	no	154.7	1.547	24.1935	primary	employed	multiparous	5	4	0	yes	typhoid and malaria	no	yes	parent	no	no	no		no	no	no		4.56	5.84	no	no	no
r074	24	27	91	130	79	stage 1 hbp	yes	163.7	1.637	33.9582	secondary	employed	multiparous	2	1	0	yes	malaria	no	no		no	no	no		no	yes	no		4.78	7.48	no	no	no
r075	25	24	92.5	116	70	normal bp	no	168	1.68	32.7735	primary	employed	multiparous	4	3	0	no		no	no		no	no	no		no	no	no		4.57	5.15	yes	yes	no
r076	26	24	59	119	61	normal bp	no	161.5	1.615	22.6207	primary	employed	multiparous	3	2	0	no		no	no		no	no	no		no	no	no		4.07	4.72	yes	no	no
r077	23	28	66	100	60	normal bp	no	166	1.66	23.9512	secondary	house wife	multiparous	2	1	0	no		no	no		no	no	no		no	no	no				yes	yes
r078	23	24	63	102	61	normal bp	no	167	1.67	22.5896	primary	employed	multiparous	5	4	0	no		no	yes	uncle	no	no	no		no	yes	no		3.88	5.83	no	no	no
r079	21	24	49.5	110	60	normal bp	no	160	1.6	19.3359	primary	employed	multiparous	2	1	0	yes	malaria	no	yes	uncle	no	no	no		no	no	no		4.47	4.15	yes	no	no
r080	34	24	85	123	78	elevated bp	yes	163.3	1.633	31.8747	primary	employed	multiparous	2	1	0	no		no	no		no	no	no		no	no	no		5.3	5.16	no	no	yes
r081	28	24	57.5	118	72	normal bp	no	167	1.67	20.6174	secondary	house wife	multiparous	3	2	0	yes	typhoid and malaria	no	no		no	no	no		yes	yes	no				yes	no
r082	30	28	72.3	120	82	stage 1 hbp	yes	154.6	1.546	30.2496	primary	employed	multiparous	3	2	0	no		no	no		no	no	no		no	no	no				yes	no
r083	25	24	63	131	65	stage 1 hbp	yes	163.7	1.637	23.5095	secondary	employed	prime gravida	1	0	0	no		no	yes	aunt	no	no	no		no	yes	no		4.61	4.51	yes	yes	no
r084	16	27	55	116	61	normal bp	no	152.3	1.523	23.7117	primary	house wife	prime gravida	1	0	0	no		no	no		no	no	no		no	no	no		4.25	5.4	no	no	no
r085	25	27	51	94	50	normal bp	no	154.6	1.546	21.3379	primary	employed	multiparous	4	3	0	no		no	yes	grand father	no	no	no		no	no	no		5.02	5.62	no	no	no
r086	19	24	60.6	126	70	elevated bp	yes	156.6	1.566	24.7109	primary	house wife	prime gravida	1	0	0	yes	malaria	no	don't know		no	no	no		no	no	no				yes	yes
r087	30	28	76.5	130	90	stage 2 hbp	yes	163.5	1.635	28.6171	primary	employed	multiparous	3	2	0	no		no	yes	uncle	no	no	no		no	no	no		4.12	4.92	yes	no	no
r088	29	28	70	119	69	normal bp	no	156	1.56	28.764	secondary	employed	multiparous	5	2	2	no		no	yes	mother	no	no	yes	stillbirth after 20 weeks	no	yes	no				no	yes
r089	18	24	60	110	70	normal bp	no	172.9	1.729	20.0706	secondary	house wife	prime gravida	1	0	0	no		no	yes	uncle	no	no	no		no	no	no		4.71	4.5	no	no	no
r090	20	28	56.5	108	70	normal bp	no	153.5	1.535	23.979	primary	house wife	prime gravida	1	0	0	yes	malaria	no	no		no	no	no		no	yes	no		4.34	5	yes	yes	no
r091	25	26	69.5	120	70	elevated bp	yes	166	1.66	25.2214	primary	house wife	multiparous	2	1	0	yes	malaria	no	no		no	no	no		no	no	no				yes	yes
r092	38	24	55	90	60	normal bp	no	163.5	1.635	20.5744	primary	house wife	multiparous	7	4	2	yes	malaria	no	no		no	no	yes	miscarriage before 20 weeks	no	yes	no		4.21	4.86	no	no	no
r093	30	24	59	110	70	normal bp	no	161.9	1.619	22.5091	primary	employed	multiparous	3	2	0	yes	malaria	no	no		no	no	no		no	no	no		5.86	7.15	yes	no	yes
r094	22	24	74	109	68	normal bp	no	161.3	1.613	28.4422	secondary	house wife	prime gravida	1	0	0	no		no	no		no	no	no		no	yes	no		4	4.79	no	no	no
r095	21	24	51	124	80	stage 1 hbp	yes	147.2	1.472	23.5372	primary	house wife	multiparous	3	2	0	yes	malaria	no	no		no	no	no		no	yes	no		4.63	4.9	no	no	no
r096	28	28	54.5	104	58	normal bp	no	166.1	1.661	19.7541	tertiary	house wife	multiparous	3	1	1	yes	malaria	no	yes	father	no	no	yes	stillbirth after 20 weeks	no	yes	no		4.64	6.81	no	no	no
r097	28	27	68	110	70	normal bp	no	157	1.57	27.5873	secondary	employed	multiparous	3	2	0	no		no	no		no	no	no		no	no	no				no	no
r098	30	24	63.5	110	76	normal bp	no	169	1.69	22.2331	primary	house wife	multiparous	4	3	0	no		no	no		no	no	no		no	no	no		4.55	5.38	yes	no	no
r099	20	27	51.5	90	60	normal bp	no	156.2	1.562	21.1079	primary	house wife	multiparous	2	0	1	no		no	no		no	no	yes	stillbirth after 20 weeks	no	no	no				no	no
r100	32	28	62.2	92	62	normal bp	no	170.5	1.705	21.3964	primary	house wife	multiparous	6	5	0	yes	malaria in pregnancy	don't know	don't know		yes	yes	no		yes	yes	no		4.55	3.51	no	no	no
r101	30	24	80	104	51	normal bp	no	163.2	1.632	30.0365	primary	house wife	multiparous	7	5	1	no		don't know	don't know		yes	yes	yes	stillbirth after 20 weeks	no	no	yes	alcohol	4.34	5.54	no	no	no
r102	29	25	75	102	70	normal bp	no	169	1.69	26.2596	tertiary	employed	multiparous	4	2	1	no		no	don't know		yes	no	yes	stillbirth after 20 weeks	no	no	no		5.6	6.88	yes	no	yes
r103	25	24	57.8	90	54	normal bp	no	165	1.65	21.2305	primary	house wife	prime gravida	1	0	0	yes	malaria	no	no		no	no	no		no	yes	no		4.07	4.38	yes	yes	no
r104	36	25	88	92	61	normal bp	no	155.4	1.554	36.4402	secondary	employed	multiparous	3	2	0	no		no	yes	sister	no	no	no		no	yes	no		4.61	8.35	no	no	no
r105	30	25	50.7	87	50	normal bp	no	162	1.62	19.3187	primary	house wife	multiparous	5	4	0	yes	malaria	no	yes	uncle	no	no	no		no	no	no		4.78	5.08	no	no	no
r106	29	28	94	120	70	elevated bp	yes	168.2	1.682	33.2258	tertiary	employed	multiparous	2	1	0	no		no	no		no	no	no		no	no	no		4.29	6.08	yes	no	no
r107	30	25	75	100	70	normal bp	no	167.1	1.671	26.8601	primary	employed	multiparous	3	2	0	no		no	no		no	no	no		no	yes	no		4.73	4.31	yes	no	no
r108	37	28	89	110	69	normal bp	no	169	1.69	31.1614	primary	employed	multiparous	10	8	1	yes	malaria	no	don't know		no	no	yes	stillbirth after 20 weeks	no	yes	no		4.7	6.24	yes	no	no
r109	30	26	70	100	60	normal bp	no	162	1.62	26.6728	primary	house wife	multiparous	5	4	0	no		don't know	don't know		yes	yes	no		no	yes	no		4.57	5.17	yes	no	no
r110	25	24	51	90	40	normal bp	no	157.3	1.573	20.6116	primary	house wife	multiparous	4	1	0	yes	ceaser	don't know	don't know		don't know	yes	no		no	no	no		4	4.07	no	no	no
r111	29	24	74	100	60	normal bp	no	162	1.62	28.1969	primary	house wife	multiparous	3	2	0	no		don't know	don't know		yes	yes	no		no	yes	no		4.58	5.53	yes	no	no
r112	25	28	55	100	60	normal bp	no	153.7	1.537	23.2817	primary	employed	multiparous	3	2	0	no		don't know	don't know		don't know	no	no		no	yes	yes	alcohol	3.84	7.78	no	no	no
r113	24	24	67	100	50	normal bp	no	160	1.6	26.1719	primary	employed	multiparous	4	3	0	no		don't know	yes	grand father	don't know	yes	no		no	yes	no		4.19	4.93	yes	no	no
r114	32	26	63	110	57	normal bp	no	171.4	1.714	21.4446	primary	employed	multiparous	7	4	2	yes	malaria	no	don't know		no	no	yes	miscarriage before 20 weeks	no	yes	no				yes	no
r115	28	28	67	100	58	normal bp	no	169.2	1.692	23.4031	secondary	house wife	multiparous	5	3	1	no		no	no		no	no	yes	stillbirth after 20 weeks	no	no	yes	smoking	4.14	5.13	yes	yes	no
r116	29	26	69.9	110	80	stage 1 hbp	yes	176.6	1.766	22.4128	tertiary	employed	multiparous	4	3	0	no		no	no		no	no	no		no	yes	no		4.46	4.9	no	no	no
r117	27	26	65	117	67	normal bp	no	157.5	1.575	26.2031	secondary	house wife	multiparous	3	2	0	no		no	no		no	no	no		no	no	no		6.29	6.45	yes	no	yes
r118	20	27	70	114	77	normal bp	no	159.8	1.598	27.4122	primary	house wife	prime gravida	1	0	0	no		no	no		no	no	no		no	no	no				yes	yes
r119	34	24	51.5	109	55	normal bp	no	157	1.57	20.8933	secondary	house wife	multiparous	4	3	0	no		no	no		no	no	no		no	no	no		4.54	4.83	no	no	no
r120	34	28	108	110	65	normal bp	no	173	1.73	36.0854	secondary	employed	multiparous	4	3	0	no		don't know	yes	uncle	yes	yes	no		no	no	no		7.53	7.17	yes	no	yes
r121	21	24	54	130	77	stage 1 hbp	yes	160.6	1.606	20.9364	primary	house wife	multiparous	2	1	0	no		no	no		no	no	no		no	no	yes	alcohol/smoking	4.35	3.92	no	no	no
r122	31	24	98	131	89	stage 1 hbp	yes	168.5	1.685	34.5165	secondary	employed	multiparous	5	3	1	yes	typhoid, malaria and ceaser	don't know	yes	aunt	yes	no	yes	miscarriage before 20 weeks	no	yes	no				no	no
r123	29	26	50	121	84	stage 1 hbp	yes	161	1.61	19.2894	primary	house wife	multiparous	2	1	0	no		no	don't know		don't know	yes	no		no	no	no				no	no
r124	23	28	60.5	106	64	normal bp	no	156	1.56	24.8603	primary	house wife	multiparous	2	1	0	yes	ceaser	no	yes	brother	don't know	no	no		no	no	no				no	no
r125	30	24	95	130	87	stage 1 hbp	yes	170.2	1.702	32.7948	primary	employed	multiparous	7	5	1	yes	ceaser	don't know	yes	grand father and uncle	yes	yes	yes	miscarriage before 20 weeks	no	no	no		5.13	5.6	no	no	yes
Key to raw data
Id: Participant identification number
g--- : Identification code series for participants from Oli HC IV study site
r--- : Identification code series for participants from ARRH study site
gweek: Gestational week
bp: Blood pressure
sbp: Systolic blood pressure
dbp: diastolic blood pressure
bpcat: Blood pressure category
stage 1 hbp: Stage 1 hypertension
stage 2 hbp: Stage 2 hypertension
raised bp: elevated bp + stage 1 hbp + stage 2 hbp
bmi: Body mass index
educ: Level of education
workstat: Working status
gravidit: Gravidity
abort: History of abortion
prevhos: History of hospitilization
hospreason: Reasons/disease condition for hospitilization
gdhist: History gestational diabetes in previous pregnancy
famdiab: Family history of diabetes
fmemb: Relationship to family member with daibetes
xweight: Excessive weight gain just before pregnancy
macros: Macrosomia in previous pregnancy
preglos: Previous loss of pregnancy
hwpreglos: nature of pregnancy loss
deform: History of baby born with deformities
exer: Physical activity/exercise of at least 30 minutes daily
subsabus: social history of substance use in current pregancy
abusubs: Substance used in pregnancy
fpg: fasting plasma glucose level
2hr ogtt: Two (2) hours oral glucose tolerance test value
uti: Urinary tract infections
cand: Candida
gd: gestational diabetes status
